# Supplementary material for: A combination of approaches evidenced seed storage behaviour in the miracle berry Synsepalum dulcificum (Schumach. et Thonn.) Daniell
Source: BMC Plant Biol. 2019 Mar 29;19:117. doi: 10.1186/s12870-019-1714-1 (PMC6440127; doi:10.1186/s12870-019-1714-1)
Supplement: Supplementary file 2 — Dataset supporting analyses of the effect of the storage environment on seed viability and germination. (XLSX 17 kb) [file 12870_2019_1714_MOESM2_ESM.xlsx]

## Sheet: Additional file 2
Additional file 2. Dataset supporting analyses of the effect of the storage environment on seed viability and germination
Storage temperature (°C )	Storage duration (days)	Replicate	Viability count	Viability fail	Germination count	Germination fail
25	3	1	20	0	20	0
25	3	2	20	0	20	0
25	3	3	20	0	20	0
25	3	4	20	0	18	2
25	3	5	20	0	19	1
10	3	1	20	0	20	0
10	3	2	20	0	19	1
10	3	3	19	1	18	2
10	3	4	19	1	19	1
10	3	5	20	0	20	0
4	3	1	11	9	10	10
4	3	2	8	12	7	13
4	3	3	10	10	10	10
4	3	4	9	11	8	12
4	3	5	11	9	11	9
0	3	1	0	20	0	20
0	3	2	0	20	0	20
0	3	3	0	20	0	20
0	3	4	0	20	0	20
0	3	5	0	20	0	20
25	7	1	20	0	19	1
25	7	2	18	2	14	6
25	7	3	14	6	12	8
25	7	4	18	2	12	8
25	7	5	17	3	14	6
10	7	1	20	0	19	1
10	7	2	20	0	14	6
10	7	3	19	1	15	5
10	7	4	19	1	16	4
10	7	5	19	1	18	2
4	7	1	8	12	7	13
4	7	2	4	16	3	17
4	7	3	6	14	6	14
4	7	4	4	16	3	17
4	7	5	3	17	3	17
0	7	1	0	20	0	20
0	7	2	0	20	0	20
0	7	3	0	20	0	20
0	7	4	0	20	0	20
0	7	5	0	20	0	20
25	14	1	18	2	10	10
25	14	2	19	1	12	8
25	14	3	17	3	11	9
25	14	4	18	2	11	9
25	14	5	15	5	10	10
10	14	1	0	20	0	20
10	14	2	0	20	0	20
10	14	3	0	20	0	20
10	14	4	0	20	0	20
10	14	5	0	20	0	20
4	14	1	0	20	0	20
4	14	2	0	20	0	20
4	14	3	0	20	0	20
4	14	4	0	20	0	20
4	14	5	0	20	0	20
0	14	1	0	20	0	20
0	14	2	0	20	0	20
0	14	3	0	20	0	20
0	14	4	0	20	0	20
0	14	5	0	20	0	20
25	21	1	10	10	3	17
25	21	2	9	11	7	13
25	21	3	6	14	1	19
25	21	4	13	7	6	14
25	21	5	12	8	6	14
10	21	1	0	20	0	20
10	21	2	0	20	0	20
10	21	3	0	20	0	20
10	21	4	0	20	0	20
10	21	5	0	20	0	20
4	21	1	0	20	0	20
4	21	2	0	20	0	20
4	21	3	0	20	0	20
4	21	4	0	20	0	20
4	21	5	0	20	0	20
0	21	1	0	20	0	20
0	21	2	0	20	0	20
0	21	3	0	20	0	20
0	21	4	0	20	0	20
0	21	5	0	20	0	20
25	28	1	1	19	0	20
25	28	2	0	20	0	20
25	28	3	0	20	0	20
25	28	4	1	19	0	20
25	28	5	0	20	0	20
10	28	1	0	20	0	20
10	28	2	0	20	0	20
10	28	3	0	20	0	20
10	28	4	0	20	0	20
10	28	5	0	20	0	20
4	28	1	0	20	0	20
4	28	2	0	20	0	20
4	28	3	0	20	0	20
4	28	4	0	20	0	20
4	28	5	0	20	0	20
0	28	1	0	20	0	20
0	28	2	0	20	0	20
0	28	3	0	20	0	20
0	28	4	0	20	0	20
0	28	5	0	20	0	20
